# 1 **Seasonal and social factors associated with spacing in a wild** 2 **territorial electric fish**

3

4 Lucía Zubizarreta <sup>1, 2</sup>, Laura Quintana <sup>2</sup>, Daniel Hernández <sup>3</sup>, Franco Teixeira de Mello <sup>4</sup>,  
5 Mariana Meerhoff <sup>4, 5</sup>, Renato Massaaki Honji <sup>6</sup>, Renata Guimarães Moreira <sup>7</sup>, \*Ana C. Silva  
6 <sup>2, 8</sup>.

7 **1** Laboratorio de Neurofisiología Celular y Sináptica, Departamento de Fisiología, Facultad  
8 de Medicina, Universidad de la República, Avenida Gral. Flores 2125, Montevideo,  
9 Uruguay.

10 **2** Unidad Bases Neurales de la Conducta, Departamento de Neurofisiología Celular y  
11 Molecular, Instituto de Investigaciones Biológicas Clemente Estable, Avenida Italia 3318,  
12 Montevideo, Uruguay

13 **3** Laboratorio de Control Ambiental, Polo Educativo Tecnológico Arrayanes, CETP-UTU,  
14 Camino Los Arrayanes Km 7, Maldonado, Uruguay.

15 **4** Departamento de Ecología y Gestión Ambiental, Centro Universitario Regional del Este,  
16 Universidad de la República, Maldonado 2000, Uruguay.

17 **5** Department of BioScience, Aarhus University, 8000 Aarhus, Silkeborg, Denmark.

18 **6** Centro de Biologia Marinha, Universidade de São Paulo (CEBIMar/USP), Rodovia Manoel  
19 Hipólito do Rego, km 131,5, São Sebastião, SP 11612-109, Brazil.

20 **7** Departamento de Fisiologia, Instituto de Biociências, Universidade de São Paulo, Rua do  
21 Matão, Trav. 14, 321, 05508-090, São Paulo, SP, Brazil.

22 **8** Laboratorio de Neurociencias, Facultad de Ciencias, Universidad de la República, Iguá  
23 4225, 11400 Montevideo, Uruguay.

24

25 \* Corresponding Author: [asilva@fcien.edu.uy](mailto:asilva@fcien.edu.uy)

## 26 **Short title**

27 Seasonal factors associated with spacing in territorial fish

## 28 **Abstract**

29 The expression of territorial behavior in wild species is especially suited to explore how  
30 animals integrate individual traits with dynamic environmental and social contexts. In this  
31 study, we focused on the seasonal variation of the determinants of territory size in the weakly  
32 electric fish *Gymnotus omarorum*. This species is a seasonal breeder that displays year-  
33 long territorial aggression, in which female and male dyads exhibit indistinguishable non-  
34 breeding territorial agonistic behavior and the only significant predictor of contest outcome  
35 is body size. We carried out field surveys across seasons that included the identification of  
36 individual location, measurements of water physico-chemical variables, characterization of  
37 individual morphometric and physiological traits, and their correlation to spatial distribution.  
38 Although *Gymnotus omarorum* tolerates a wide range of dissolved oxygen concentration,  
39 territory size correlated with dissolved oxygen in both seasons. In the non-breeding season,  
40 we show that territory size is sexually monomorphic and explained only by body size. In the  
41 breeding season, while body size no longer correlated with territory size, evidence of sexual  
42 differences in territory size determinants emerged. First, the overall spatial arrangement  
43 adopted a sexual bias. Second, territory size depended on gonadal hormones in both sexes,  
44 which was expected for males, but not previously reported in females. Third, females'  
45 territory size correlated with gonadal size and females showed relatively larger territories  
46 than males, probably to meet sexually dimorphic energetic requirements. This study  
47 provides evidence of seasonal changes in factors correlated with territory size and  
48 contributes to the understanding of the mechanisms underlying behavioral plasticity.

49

## 50 **Keywords**

51 Non-breeding aggression, sexual dimorphism, *Gymnotus omarorum*, gonadal steroids

52

## 53 **Introduction**

54 The mechanisms underlying behavioral plasticity, by which animals adapt to dynamic  
55 environmental and social contexts, are far from being fully understood (1). The study of the  
56 modulation of territorial behavior in wild model species is especially suited for this aim, as  
57 animals assess the environmental and social clues that determine territory quality and this  
58 information is contrasted with individual requirements and fighting abilities, to decide  
59 whether to compete over an area or not. Therefore, the distribution of territorial animals in  
60 space provide a hint on the integration of individual traits with environmental and social  
61 factors. Variation in the ability or motivation to obtain and defend a territory can generate  
62 differences in territory size, as traits such as body mass, sex, and reproductive state are  
63 known to influence resource holding potential and resource value (2–6). Within a population,  
64 body size is associated with territory size across species, as it directly correlates with  
65 metabolic requirements. Body size is the universal indicator of physical strength and thus it  
66 strongly impacts on contest outcome and territory size (7–10). In species that display  
67 territoriality in both sexes, asymmetry in fighting abilities or motivational factors may lead to  
68 sex differences in territory size; for example, in red squirrels (*Sciurus vulgaris*), in which  
69 males often hold larger territories than females (11) or in the striped plateau lizard  
70 (*Sceloporus virgatus*), in which females are more territorial than males (12).

71

72 Many species show territorial behavior only during the breeding season (13). On the other  
73 hand, some species across different phylogenetic groups, in spite of being seasonal  
74 breeders, show robust territorial aggression all year round, as has been reported in birds  
75 (14–17), mammals (18–20), reptiles (21), and fish (22,23). These species offer a valuable

76 opportunity to study the seasonality of environmental features and individual traits, and their  
77 relation to territory size in the natural habitat. During the breeding season, male territorial  
78 aggression is largely dependent on sexual gonadal steroids across vertebrates (24–26) and,  
79 in particular, androgen levels have been related to territory size in the wild (27–30). In  
80 contrast, in breeding females, there are few studies on the association between estrogen  
81 ( $E_2$ ) circulating levels and territorial aggression in free-living conditions (31–33), and, to our  
82 knowledge, there are no studies reporting the association between circulating  $E_2$  and  
83 territory size.

84

85 The weakly electric South American fish, *Gymnotus omarorum* (34), is a seasonal breeder  
86 that displays male and female territorial aggression all year-long and thus is an interesting  
87 model system to study the seasonal control of territoriality and its sex differences. Previous  
88 laboratory results showed that this species presents a remarkably robust non-breeding  
89 territorial aggression (initially described in (22)), with well-characterized agonistic behavioral  
90 displays including modulations of the electric organ discharge (EOD) to signal submission  
91 (35–37) and a dominant phenotype that persists for at least 36 hours (38). Under  
92 experimental laboratory conditions, male-male and female-female dyads that display non-  
93 breeding territorial behavior have shown no differences in either contest outcome, temporal  
94 dynamics of the agonistic encounter, levels of aggression, nor submissive signaling (39).  
95 Moreover, the only significant predictor of contest outcome is body size (22), and none of  
96 the features of agonistic encounters depends on circulating gonadal hormones (40).

97

98 In this study, we aimed to evaluate the seasonal variation of the ecological, morphometric,  
99 and physiological correlates of territory size in the wild in *Gymnotus omarorum*. In the non-  
100 breeding season, when gonads are regressed and thus circulating gonadal hormones are

101 low, we stand on previous behavioral results to predict that territory size would be sexually  
102 monomorphic and explained mostly by body size, regardless of variations in local  
103 environmental characteristics. In the breeding season, when motivational aspects of  
104 territoriality may be confounded with the reproductive drive, we expected the emergence of  
105 sexual dimorphism in territory size determinants.

106

## 107 **Materials and Methods**

108

### 109 Study location and sampling seasons

110 Fieldwork was carried out in the Laguna de los Cisnes, Uruguay (205 ha, 34° 48' S, 55° 18'  
111 W) which composes a three-part interconnected shallow system (maximum depth 5 m) and  
112 has no inputs of salt or brackish water (Fig. 1A, (41)). The study species, *Gymnotus*  
113 *omaronum*, is a weakly electric fish, the only one present in the area of study from the several  
114 electric species present in Uruguay. The littoral area of the lake is blanketed by a strip (5-40  
115 m with) of dense mats of free-floating aquatic macrophytes that cover the sampling area  
116 (Fig. 1B), with *G. omaronum* typically living among the roots of these plants (34).

117

118 **Figure 1:** Study site and sampling method. A. The study site is located in Maldonado, Uruguay, in  
119 Laguna de los Cisnes. B. The shores of the lake have water hyacinths creating extensive floating  
120 mats that constitute the sampling area. C. Census unit illustrating individual spots. Fish location in  
121 individual spots was achieved by carrying out an electric census. Once a fish was located, water  
122 dissolved O<sub>2</sub> concentration, temperature, and fish EOD rate were measured in each spot.

123

124 Following Quintana et al. (2004), who identified the breeding season for weakly electric fish  
125 species in the neotropical subtropical region from December to February (austral summer),  
126 we collected field data during December, corresponding to the early-breeding season before

127 the appearance of offspring (42), and from June to August (austral winter), corresponding  
128 to the non-breeding season.

129

### 130 Sampling method

131 Sampling area was homogeneous in depth, distance to shore, and vegetation composition.

132 The sampling area was divided into adjacent transects referred to as census units (Fig. 1B  
133 and 1C, defined below), which were each studied in different days, without repeating sites.

134 Sampling was performed during the day, which is the resting phase of animals in this species  
135 (43), in two stages: the first one (field survey 1) during the morning from 8 to 12 AM, and the  
136 second one (field survey 2) from 1 to 6 PM.

137 All research procedures complied with ASAP/ABS Guidelines for the Use of Animals in  
138 Research and were approved by the Institutional Ethical Committee (Comisión de Ética en  
139 el Uso de Animales, Instituto Clemente Estable, MEC, 02-2012).

140

### 141 Field survey 1: Electric census and environmental variables.

142 In order to achieve a first picture of the spatial arrangement of individuals, we carried out an  
143 electric census during the resting phase of the animals and measured the distance between  
144 each fish and its nearest neighbor (distance to the nearest neighbor, DNN) in the two  
145 seasons. To calculate DNN, we considered each focal fish distance to the nearest neighbor,  
146 even if the neighbor was not retrieved. The electric census implies the location of individual  
147 fish by means of an electronic audio amplifier connected to a pair of electrodes, as described  
148 elsewhere (44), and enables to locate individual fish through its EODs when the sound is  
149 maximal (detection range is 60 cm). The EOD rate monitoring also allows researchers to  
150 confirm that fish remain undisturbed during the measurement of parameters. Gymnotids  
151 show a typical behavior called the novelty response (reviewed in (45)), which consists of a

152 transient increase in the EOD rate triggered by changes in nearby impedance, i.e., changes  
153 in its surrounding environment (46). To perform the electric census, two experienced  
154 researchers waded up to 1.2 m depth in the water, to slowly and carefully access places 1  
155 m away from individual fish. Once a fish was located in an individual spot (Fig. 1C), the plant  
156 above it was tagged, and conductivity, dissolved oxygen concentration ( $O_2$ , mg/l) and water  
157 temperature (T, °C) were measured 30 cm below the surface (using TDSu Testr 3, Cole  
158 Parmer for conductivity, and OxyWard, Handy Polaris for  $O_2$  and T). After taking physico-  
159 chemical measurements, the EOD of each fish was recorded in situ for 10 seconds by  
160 means of two electrodes lowered in the vicinity of the animal, connected (by 10-30 m cables)  
161 to an amplifier located on the shore of the lake (World Precision Instruments Inc., Sarasota,  
162 FL. DAM-50, AC-coupled). After amplified, signals were recorded on a portable computer,  
163 captured by the audio card and stored for further analysis. In order to normalize the potential  
164 effect of water temperature on EOD rate, values were corrected to a constant 20°C  
165 temperature by using the Q10 value of 1.5 as calculated for electric fish (47,48). Q10 is a  
166 unitless quantity calculated as the factor by which the EOD rate increases when the  
167 temperature (T) is raised by 10 °C and is calculated as:  $Q10 = \frac{\text{EOD rate} \times T}{\text{EOD rate} \times (T$   
168  $+ 10)}$ .

169 During each sampling day, the measurement of physico-chemical water parameters and  
170 EOD rate was repeated for all the fish located within a census unit. A census unit was  
171 defined as the area with all fish detected until 12 AM, or the area where we detected a group  
172 of fish surrounded by at least 6 meters of water uninhabited by the species (Fig. 1C).

173

174 Field survey 2: Capture and quantification of individual traits.

175 In addition to environment variables, individual traits can influence spatial distribution and  
176 be different depending on the season. Therefore, based on field survey 1, we characterized

177 morphometric and physiological traits of retrieved fish in both seasons, and then analyzed  
178 its correlation to spatial distribution. Individual spots were revisited in order, and each fish  
179 located under the tagged plants was collected using a net.

180 In the breeding season, immediately after netted, fish were anesthetized by immersion in a  
181 fast-acting eugenol solution (1.2 mg/l, first dissolved in alcohol 70%) for blood sampling from  
182 the caudal vein with a heparinized syringe in less than 3 min, which is the time range usually  
183 used to avoid a stress response due to manipulation (49–51). Captured fish were then  
184 weighed, measured and their gonads were visually inspected for sex determination. Blood  
185 was placed in tubes in ice to be centrifuged and stored at -80 °C in the laboratory (six hours  
186 later), gonads dissected in the field were stored in dry ice, and then weighed in the laboratory  
187 for gonadosomatic index (GSI) calculation. The index was later calculated for all adult  
188 animals as  $[\text{Gonad Weight} / \text{Total Tissue Weight}] \times 100$  (52).

189

#### 190 Hormone assays

191 Blood samples were taken in the field as described above, and once in the laboratory plasma  
192 was separated by centrifuging the samples at 3000 rpm for 10 min and stored at -80 °C until  
193 assayed. 17- $\beta$  Estradiol (E<sub>2</sub>) levels were quantified in breeding females, and 11-  
194 Ketotestosterone (11-KT) in breeding males by enzyme-linked immunosorbent assay  
195 (ELISA) using commercial kits (IBL International, Hamburg, Germany for E<sub>2</sub> and Cayman  
196 Chemical Company, MI, USA for 11-KT). The analyses were carried out according to the  
197 manufacturer's instructions and a standard curve was run for each ELISA plate. In all cases,  
198 samples were assayed in duplicate and analyses were carried out on samples whose  
199 coefficients of variation were below 20% (53). Intra-assay variation was 3.95 % for E<sub>2</sub>  
200 (detection limit: 25 pg/ml) and 6.2 % for 11-KT (detection limit: 1.56 pg/ml). Pilot assays  
201 using three different dilutions of 8 samples (4 samples per sex) were run to establish the



202 appropriate working dilutions, which were 1:2 for breeding female E<sub>2</sub> and 1:30 for breeding  
203 male 11-KT. The assays were validated with standards provided in the kit, indicating that  
204 each assay effectively detects *G. omarorum* E<sub>2</sub> and 11-KT.

205

#### 206 Data analysis and statistics

207 All data were subjected first to D'Agostino & Pearson omnibus normality test. If data fitted to  
208 a gaussian distribution, were analyzed with parametric tests, otherwise non-parametric  
209 comparisons were carried out. Environmental variables (O<sub>2</sub> and T) were compared between  
210 seasons by Mann-Whitney *U* test. To analyze O<sub>2</sub> and T heterogeneity we calculated the %  
211 coefficient of variation (% CV, SD/mean\*100) for each census unit and then the mean %CV  
212 and SD per season. Fish individual traits (body length and EOD rate), and DNN were  
213 compared between sexes within each season by t-tests. Body length, EOD rate and DNN  
214 were compared seasonally by t-test for females and males together.

215 To examine the effect of individual traits (see below) on DNN as the dependent variable we  
216 used generalized linear models (GLM; (54)), in each season by separate. For the breeding  
217 season, we first ran a model with body length, EOD rate and sex as explanatory variables.  
218 Because the initial model was non-significant, we ran one model for females with body  
219 length, EOD rate, and circulating E<sub>2</sub> as explanatory variables, and a second model for males  
220 with body length and EOD rate as explanatory variables. For the non-breeding season, the  
221 model included both, females and males together, and explanatory variables were body  
222 length, EOD rate and sex. For each season separately, initial models contained all single  
223 effects and pairwise interactions of the explanatory variables. To select the most  
224 parsimonious GLM, we used the command *bestglm* (55), for a maximum of 3 simultaneous  
225 variables, and considering up to second order interactions. Initial models were simplified by  
226 the stepwise deletion of the least significant terms in a model and comparing successive

227 steps of model simplification by the Akaike information criterion (AIC), deleting a term  
228 whenever there was a difference of more than 2 units between alternative models until  
229 arriving to the most parsimonious model that could be fitted. The selection of the best model  
230 included the AIC criterion as well as the number and statistical significance of the estimated  
231 parameters, discarding models with improvements in the AIC but non-significant  
232 parameters. All models were subjected to the customary residual analysis (56).

233 To evaluate if the sex of the nearest neighbor was different from what is expected by a  
234 random distribution, we used Binomial tests (57). For the analysis, the focal fish was only  
235 considered if the nearest neighbor was retrieved and the sex determined. The proportion of  
236 sexes expected for a random distribution was deduced from the empirical sex ratio observed  
237 in each season.

238 Parametric, non-parametric statistical analyses, and simple linear regressions were carried  
239 out with PAST (58), and GLMs and Binomial tests with software R (59) using RStudio  
240 interface.

241

## 242 **Results**

243

244 Individuals of *Gymnotus omarorum* were located at approximately 30 cm of depth among  
245 the dense roots of extensive floating mats of vegetation along the littoral area across  
246 seasons (Fig. 1B; i.e., in the breeding season during the austral summer from December to  
247 February, and in the non-breeding season during the austral winter from May to August).

248 The water hyacinth *Eichhornia crassipes* dominated both surface and underwater areas  
249 accounting for 86% of the total subaquatic biomass. Associated vegetation was composed  
250 by the submerged *Egeria densa* and *Miriophyllum aquaticum*, the free-floating *Salvinia*  
251 *auriculata*, and the rooted but partly emergent *Ludwigia elegans*, and *Hydrocotyle*

252 *criptocarpa*. This vegetation was present year-long although overall coverage was lower  
253 during the non-breeding season.

254 As expected in the subtropical region, water temperature and oxygen content showed  
255 significant differences across seasons. Water temperature was higher during the breeding  
256 than during the non-breeding season ( $27.3 \pm 0.1$  °C, N = 36 vs  $11.3 \pm 0.5$  °C, N = 60;  $p <$   
257  $0.0001$ , Mann Whitney  $U$  test), whereas O<sub>2</sub> concentration was significantly lower in the  
258 breeding compared to the non-breeding season ( $5.6 \pm 0.9$  mg/l, N = 36, vs  $8.4 \pm 0.4$  mg/l, N  
259 = 65;  $p = 0.004$ , Mann Whitney  $U$  test). In contrast, water conductivity remained consistently  
260 below 150  $\mu$ S/cm throughout the year.

261

#### 262 **Field survey 1: Fish spatial distribution and environmental variables**

263 Fish (dots in Fig. 1C) were detected by electrical census in individual sites located under the  
264 central area of the floating mats, and absent from the edge limiting the open water (Fig. 1C).  
265 In both seasons, fish were found in an even distribution, non-aggregated with other  
266 conspecifics. The distribution of DNNs was asymmetrical, skewed with a mode at 1.5 m (Fig.  
267 2A). The DNN mean value was significantly higher in the breeding season than in the non-  
268 breeding season ( $2.3 \pm 0.15$  m, N = 47 vs  $1.4 \pm 0.07$  m, N = 73;  $p < 1 \text{ exp-}4$ , t-test).

269 Water temperature showed low variability among individual spots within each census unit  
270 (breeding season mean T CV =  $2.0 \pm 2.4$  %, non-breeding season mean T CV =  $6.5 \pm 5.5$   
271 %). In contrast, O<sub>2</sub> concentration showed high variability within each census unit (breeding  
272 season mean O<sub>2</sub> CV =  $20.4 \pm 9.3$  %, non-breeding season mean O<sub>2</sub> CV =  $25.9 \pm 14.6$  %),  
273 and thus we explored whether O<sub>2</sub> could account for fish spatial patterns. During the breeding  
274 season, the distribution of O<sub>2</sub> concentration ranged from 0 to 15 mg/l and was positively  
275 skewed (Fig. 2B), with a higher frequency of low values (mode at 1 mg/l). However, during  
276 the non-breeding season, O<sub>2</sub> distribution was negatively skewed, showing a single mode at

277 11 mg/l (Fig. 2B). Oxygen concentration and DNN showed a positive and significant  
278 association both in the breeding season ( $R^2 = 0.44$ ,  $p = 1 \times 10^{-4}$ ,  $N = 31$ , Fig. 2C green)  
279 and the non-breeding season ( $R^2 = 0.21$ ,  $p = 1 \times 10^{-4}$ ,  $N = 50$ , Fig. 2C gray).

280

281 **Figure 2:** Fish spatial distribution based on environmental variables. The breeding season is  
282 represented in green and the non-breeding season in gray; dark green sections implies overlap of  
283 both seasons. A. Frequency distribution versus distances to the nearest neighbor (DNN, in meters).  
284 B. Frequency distribution versus oxygen concentration (in mg/l) measured at 30 cm from the surface  
285 in each individual spot. C. Linear correlation of distance to the nearest neighbor and oxygen  
286 concentration in individual spots Breeding season:  $R^2 = 0.44$ ,  $p = 1 \times 10^{-4}$ ,  $N = 31$ , non-breeding  
287 season:  $R^2 = 0.21$ ,  $p = 1 \times 10^{-4}$ ,  $N = 50$ .

288

### 289 **Field survey 2: Fish spatial distribution based on individual traits**

290 There were no sexual differences in body length, EOD rate or DNN in both the breeding and  
291 the non-breeding season (Table 1). During breeding, females showed circulating mean  $E_2$   
292 levels of  $293.7 \pm 97.7$  pg/ml and males had mean 11-KT circulating levels of  $399.1 \pm 140.9$   
293 pg/ml. From a seasonal perspective, breeding fish were significantly larger than non-  
294 breeding ones ( $p < 1 \times 10^{-4}$ ,  $N$  breeding season = 28,  $N$  non-breeding season = 53; t-test).  
295 In addition, EOD rate was higher ( $p < 1 \times 10^{-4}$ ,  $N$  breeding season = 30,  $N$  non-breeding  
296 season = 36; t-test) and DNN was larger during the breeding season ( $p < 1 \times 10^{-4}$ ,  $N$   
297 breeding season = 31,  $N$  non-breeding season = 46, t-test).

298 We evaluated the determinants of DNN separately in the breeding and non-breeding  
299 seasons. As the first GLM including breeding females and males, with body length, EOD  
300 rate, and sex as explanatory variables was not significant, we separated sexes into two  
301 different models and included circulating  $E_2$  levels as an explanatory variable for females.

302 We obtained two significant models in females, both equivalent according to the AIC criterion  
 303 (Table 2). In the model with the best adjustment (model 1), DNN showed a positive  
 304 correlation with circulating E<sub>2</sub>, and a negative correlation with EOD rate. In model 2, EOD  
 305 rate was not a significant explanatory variable for DNN and only E<sub>2</sub> had a significant positive  
 306 correlation. For males, we were unable to find a correlation between the independent  
 307 variables tested and DNN. Although androgen levels were not included in the model (due to  
 308 a low number of valid samples), it is worth mentioning that circulating 11-KT levels showed  
 309 a positive trend with DNN in a simple linear regression (p = 0.049; R<sup>2</sup> = 0.77; N = 5). During  
 310 the non-breeding season, as all traits quantified were represented in both sexes, we were  
 311 able to run females and males together when testing the influence of individual traits on  
 312 DNN. We explored if individual sex, body size, and EOD rate correlated with DNN, and found  
 313 that body size, but not sex nor EOD rate, correlated positively with DNN (Table 3).

314 **Table 1:** Sexual comparison of individual traits and distance to the nearest neighbor in the breeding  
 315 season and in the non-breeding season. Individual traits: Body length and electric organ discharge  
 316 (EOD) rate corrected by water temperature. Distance to the nearest neighbor (DNN). Values are  
 317 expressed as mean ± standard error of the mean (SEM), and statistical comparisons carried out by  
 318 t-test.

319

|                           | Body size (cm)       |                      | EOD rate <sub>temp</sub> |                      | DNN (m)             |                     |
|---------------------------|----------------------|----------------------|--------------------------|----------------------|---------------------|---------------------|
|                           | ♀                    | ♂                    | ♀                        | ♂                    | ♀                   | ♂                   |
| <b>A- Breeding season</b> | 22.4 ± 0.5<br>n = 13 | 24.5 ± 0.9<br>n = 15 | 41.0 ± 1.1<br>n = 13     | 39.3 ± 0.9<br>n = 17 | 2.2 ± 0.2<br>n = 13 | 2.3 ± 0.3<br>n = 18 |
|                           | ♀ vs ♂ p = 0.2       |                      | ♀ vs ♂ p = 0.3           |                      | ♀ vs ♂ p = 0.8      |                     |

|                               |                      |                      |                      |                       |                      |                     |
|-------------------------------|----------------------|----------------------|----------------------|-----------------------|----------------------|---------------------|
| <b>B- Non-breeding season</b> | 16.9 ± 0.9<br>n = 26 | 17.4 ± 0.8<br>n = 27 | 20.0 ± 1.2<br>n = 18 | 19.3 ± 0.95<br>n = 18 | 1.13 ± 0.1<br>n = 23 | 1.2 ± 0.1<br>n = 23 |
|                               | ♀ vs ♂ p = 0.7       |                      | ♀ vs ♂ p = 0.6       |                       | ♀ vs ♂ p = 0.5       |                     |

320

321 **Table 2:** GLM models that presented the best adjustment to explain the distance to the nearest  
 322 neighbor in females during the breeding season. Model intercept and explanatory variables are  
 323 expressed as Mean (SD). For each parameter the value is shown in bold if statistically significant  
 324 (<0.05), in italic if marginal (<0.1), and expressed as NS if non-significant. Model 1 and Model 2 did  
 325 not present significant differences by the Akaike information criterion (AIC).

| Model | Intercept          | Circulating E <sub>2</sub> | EOD rate              | N  | P model | Adjusted R <sup>2</sup> | AIC   |
|-------|--------------------|----------------------------|-----------------------|----|---------|-------------------------|-------|
| M1    | <b>4.52</b> (1.41) | <b>1.4e-3</b> (0.03)       | <i>-0.051</i> (0.027) | 13 | 0.022   | 0.44                    | 20.24 |
| M2    | <b>1.88</b> (0.18) | <b>1e-3</b> (4e-4)         | NS                    | 13 | 0.028   | 0.31                    | 22.21 |

326

327

328 **Table 3:** GLM model that presented the best adjustment to explain the distance to the nearest  
 329 neighbor in both sexes during the non-breeding season. Model intercept and explanatory variable are  
 330 expressed as Mean (SD). For each parameter the value is shown in bold if statistically significant  
 331 (<0.05).

| Intercept    | Body size           | N  | P model | Adjusted R <sup>2</sup> | AIC   |
|--------------|---------------------|----|---------|-------------------------|-------|
| 0.364 (0.34) | <b>0.052</b> (0.02) | 48 | 0.014   | 0.11                    | 79.75 |

332

333 Although DNN was larger in the breeding season in both sexes, this seasonal difference  
 334 disappeared in males when DNN was normalized by fish body size (0.08 ± 0.007, N = 17 vs  
 335 0.1 ± 0.01, N = 22; p = 0.16, t-test, Fig 3A). Interestingly, in females, DNN normalized by  
 336 body size was significantly higher during the breeding season than in the non-breeding  
 337 season (0.1 ± 0.008, N = 13 vs 0.07 ± 0.006, N = 23; p = 0.01, t-test, Fig 3A).

338

339

340 **Figure 3:** Emergence of sex dimorphism during the breeding season.

341 The plots show values for females (left panels, represented as squares) and males (right panels,  
342 represented as circles); colors indicate breeding (green) and non-breeding (grey) seasons.

343 **A-** Distance to the nearest neighbor (DNN in m) corrected by body length (cm). **B-** Gonadosomatic  
344 index (GSI). Dots represent individual values, and in A and B horizontal line represent mean values,  
345 and error bars represent SEM. For each sex, breeding values are shown in the left (green) and non-  
346 breeding values in the right (grey). \* indicate statistically significance ( $p < 0.05$ ) t-test. **C-** Linear  
347 regression between body size (cm) and DNN (m) in the breeding season. Females:  $p = 0.8$ ,  $R^2 =$   
348  $0.007$ ,  $N = 13$ ; males  $p = 0.7$ ,  $R^2 = 0.01$ ,  $N = 15$ . **D-** Linear regression between GSI and DNN (m) in  
349 the breeding season. Females:  $p = 0.001$ ,  $R^2 = 0.8$ ,  $N = 9$ ; males:  $p = 0.14$ ,  $R^2 = 0.25$ ,  $N = 10$ .

350

351 Animals sampled in both seasons differed in their gonadosomatic index depending on the  
352 sex (Fig. 3B). In females, GSI was significantly higher in the breeding season than in the  
353 non-breeding season ( $1.1 \pm 0.22\%$   $N = 9$  vs  $0.6 \pm 0.09\%$   $N = 11$ ;  $p = 0.02$ , t-test), whereas  
354 males did not show seasonal differences ( $0.24 \pm 0.03\%$   $N = 10$  vs  $0.23 \pm 0.03\%$   $N = 16$ ;  $p =$   
355  $0.87$ , t-test). Body size did not correlate with DNN in the breeding season (females,  $p = 0.8$ ,  
356  $R^2 = 0.007$ ,  $N = 13$ ; males  $p = 0.7$ ,  $R^2 = 0.01$ ,  $N = 15$ ; Fig. 3C). In the breeding season, GSI  
357 strongly correlated with DNN in females ( $p = 0.001$ ,  $R^2 = 0.8$ ,  $N = 9$ ; Fig. 3D), whereas the  
358 correlation was not significant in males ( $p = 0.14$ ,  $R^2 = 0.25$ ,  $N = 10$ , Fig. 3D).

359

360 In the breeding season, the spatial arrangement of sexes showed a specific configuration in  
361 which the percentage of females with a female as the nearest neighbor was significantly  
362 lower than the random distribution ( $p = 0.03$ ,  $N = 11$ ; Binomial exact test, Fig. 4A). In the same  
363 sense, the percentage of males with a female as the nearest neighbor was significantly  
364 higher than the random distribution ( $p = 0.04$ ,  $N = 16$ ; Binomial exact test, Fig. 4A). In contrast,  
365 the spatial configuration of the population in the non-breeding season showed a random



366 arrangement of both males and females. The probability of having a female as the nearest  
367 neighbor was not significantly different from the random distribution for both females  
368 ( $p=0.82$ ,  $N = 20$ ; Binomial exact test, Fig. 4B) and males ( $p=0.12$ ,  $N = 15$ ; Binomial exact  
369 test, Fig. 4B).

370

371 **Figure 4:** Seasonality in the spatial distribution of sexes. Sex of the nearest neighbor (expressed in  
372 percentage) when the focal fish is a female or a male, both in the breeding season (A, top), and in  
373 the non-breeding season (B, bottom). Dashed line represents the expected percentage to have a  
374 female as nearest neighbor for a random distribution, according to the empirical sex ratio (41% in the  
375 breeding season, and 50.9% in the non-breeding season). \* indicate statistical significance ( $p<0.05$ )  
376 according to the binomial exact test.

377

## 378 Discussion

379 This study contributes to the understanding of the mechanisms underlying behavioral  
380 plasticity by reporting for the first time seasonal and sexual differences in the determinants  
381 of territory size in a teleost species. In the first place, we found that *Gymnotus omaroum*  
382 presents a spatial arrangement in the natural habitat consistent with territoriality across  
383 seasons. In addition, we confirmed our predictions: a) In the non-breeding season, territory  
384 size was sexually monomorphic and partially determined by individual body size; and b) in  
385 the breeding season, sexual differences emerged given that the spatial arrangement  
386 adopted a sexual bias and that females hold gonadal-dependent larger territories.

387

388 Body mass has strong relationships with a variety of physiological and ecological attributes,  
389 such as home range and metabolic rates and is key to understanding how animals use the  
390 environment (60–63). The distribution of differently sized animals can be shaped by  
391 behavioral interactions such as the defense of foraging resources (64). These ideas, put

392 forth initially to analyze interspecific interactions, can be also applied to interpret distribution  
393 of individuals of the same species, as in this study (65). We found that body size predicted  
394 DNN in the non-breeding season but not in the breeding season (Tables 2 and 3). This  
395 suggests that during reproduction other physiological, behavioral, and motivational aspects  
396 may be overriding body size as a predicting trait on DNN, a proxy for territory size.

397 Oxygen is a limiting physico-chemical variable in aquatic ecosystems, and low  
398 concentrations of dissolved O<sub>2</sub> has been related to fish mortality (66). Interestingly,  
399 *Gymnotus* has been shown to be tolerant to a wide range of dissolved O<sub>2</sub> concentration and  
400 can survive in places with hypoxia (67), as it is capable of breathing from air in addition to  
401 metabolic adaptations which compensate for any potential damages hypoxia may cause  
402 (68). Although different individual spots showed variable O<sub>2</sub> concentration, and O<sub>2</sub> correlated  
403 with territory size in both seasons, it remains to be understood whether high O<sub>2</sub>  
404 concentration may be a valuable attribute of territories in this species. In this regard, despite  
405 being tolerant to hypoxia, higher concentration of available O<sub>2</sub> could most probably offer a  
406 less demanding context for fish.

407

#### 408 Non-breeding spacing: body size dependent and sex independent

409 In teleosts, year-round territoriality has been mostly approached in populations of coral reef  
410 communities (for example *Stegastes fuscus*, (69)). Here, we evaluated the seasonal spatial  
411 organization in a subtropical freshwater fish in the field and found that spatial distribution  
412 during winter was consistent with territoriality. Why would *Gymnotus* defend non-breeding  
413 territories? The acquisition and maintenance of territories are known to be mediated by  
414 agonistic behavior (70). In particular, previous reports of laboratory experiments  
415 demonstrated that *Gymnotus omarorum* exhibits non-breeding agonistic behavior that  
416 mediates territory access (38) and that body size is the main determinant of the outcome of

417 fights (22). Electric fish present high basal metabolic requirements associated to  
418 electrogeneration (71), which impose an additional constant need to forage. In line with this,  
419 we have found that larger fish hold larger territories (Table 3). Body size is sexually  
420 monomorphic in this species and behavioral experiments have shown that agonistic  
421 behavior is non-sex-biased (22,39). In this study, we confirmed that non-breeding males and  
422 females hold sexually monomorphic territory sizes in the wild, probably to cope with  
423 energetic requirements that are not expected to be sexually different during winter.

424 Electric fish use electric communication signals as behavioral displays. As EOD encodes  
425 information about body size and physiological state (72–74), territory boundaries could be  
426 maintained in the wild by remotely assessing the EOD of neighbors. Status dependent EOD  
427 rate-rank occurs only when fish are kept in close quarters after conflict resolution, but not  
428 when allowed to distance themselves (38). Thus, we did not expect to find correlations  
429 between EOD rate and territory size in the field, as was the case (Table 3). EOD rate rank  
430 may be a behavior needed to reinforce submission when a subordinate individual is unable  
431 to escape from the dominant as in confined laboratory conditions but not in the wild under  
432 the population densities observed in this study.

433

#### 434 Breeding spacing: the emergence of sexual dimorphism in territory determinants

435 While competition for reproductive opportunities is usually sexually dimorphic, competition  
436 over non-sexual resources can be expected to be balanced between males and females  
437 (75,76). Moreover, species of different phylogenetic groups with male and female  
438 territoriality have been found to display sexual monomorphism in body size and signal traits  
439 (77–79). Consistently, we found that during the breeding season absolute territory sizes  
440 were sexually monomorphic, which is consistent with the lack of sex dimorphism in body  
441 size (Table 1). However, during breeding, body size did not correlate with territory size (Fig.

442 3A and B), suggesting there are other factors overcoming body size influence on habitat  
443 resource acquisition and maintenance.

444 Interestingly, a closer analysis of our data showed that territory size relative to body size  
445 was sexually dimorphic. Females seemed to need larger territories in the breeding season  
446 compared to the non-breeding season (Fig. 3A), but males showed no seasonal difference  
447 (Fig. 3B). This result can be interpreted in the context of the energetic cost imposed by  
448 ovarian maturation, as GSI showed an excellent predicting power on female territory size  
449 (Fig. 3 A). Steroid hormones are crucial as mediators of behavioral plasticity (1). Sex steroids  
450 orchestrate integrated responses in the organism, and also respond depending on the social  
451 environment (80,81). Not surprisingly, circulating  $E_2$  positively correlated with territory size  
452 in females (Table 2). The fact that both GSI and  $E_2$  correlated with female territory size, in  
453 addition with reports in which  $E_2$  promotes female aggression (82–84), suggests that ovarian  
454  $E_2$  modulates territorial behavior in *G. omarorum*. We hypothesize that  $E_2$  is integrating  
455 female metabolic requirements with the social environment, through the expression of  
456 territorial behavior. On the other hand, males showed a trend between circulating 11-KT and  
457 territory size, which was expected given the well documented relationship between  
458 androgens and male territoriality (24–26).

459

460 In the breeding season, sexually dimorphic individual traits may influence motivation towards  
461 territory defense, and thus be reflected in the spatial pattern (11,12). The results presented  
462 in this study suggest that *G. omarorum* can assess territory features and use this information  
463 to relocate at different times of the year. In the non-breeding season individual fish had a  
464 closest neighbor which was randomly either of the same or opposite sex, whereas in the  
465 breeding season, it was more likely to have an opposite-sex closest neighbor (Fig. 4). This  
466 evidence supports the idea that the sex of the nearest neighbor becomes a relevant factor

467 for territory value, but only during breeding. This can be considered a good example of  
468 behavioral plasticity by which individuals respond differently to the same social stimulus  
469 (e.g., sex of the nearest neighbor), depending on variations in their internal state (sexually  
470 dimorphic hormones).

471

#### 472 Concluding remarks

473 *Gymnotus omarorum* is a species which offers the opportunity to analyze seasonal changes  
474 in year-round territoriality. Although we found no differences in absolute territory size  
475 between sexes across the year, territory size was truly sexually monomorphic only in the  
476 non-breeding season, in which body size was the only significant determinant of territory  
477 size. In contrast, in the breeding season sex became relevant for the territorial behavior of  
478 this species: a) the sex of neighbors matters; b) territory size depended on gonadal  
479 hormones in both sexes, which was expected for males, but not previously reported in  
480 females; and c) females needed relatively larger territories than males which may reflect  
481 particular sex-biased reproductive requirements consistent with metabolic demands of  
482 anisogamy. This study contributes to bridge the gap between behavioral plasticity of natural  
483 territorial behavior and its underlying mechanisms.

484

#### 485 **Author's contributions**

486 L.Z., L.Q., and A.S. conceived and designed the overall study.

487 M.M. and F.T.M. contributed to the design of field sampling.

488 L.Z., L.Q., F.T.M., M.M., and A.S. collected the data.

489 L.Z., R.H.M., and R.G.M. processed and interpreted hormone data.

490 L.Z. and D.H. analyzed all data.

491 L.Z., L.Q., D.H., F.T.M., M.M., and A.S. interpreted results.

492 L.Z., L.Q., and A.S. led the writing of the manuscript.

493 L.Q. and A.S. funding acquisition.

494 All authors contributed critically to the drafts and gave final approval for publication.

495

#### 496 **Acknowledgements**

497 We are very grateful to Adriana Migliaro, Rossana Perrone, Carlos Passos, Federico Reyes,  
498 and Bettina Tassino for their useful discussions during the BERTA Workshop, Cerro del

499 Toro, Piriápolis, Uruguay. L.Z., L.Q., F.T.M., M.M., and A.S would like to thank to Agencia

500 Nacional de Investigación e Innovación (ANII), Programa de Desarrollo de las Ciencias

501 Básicas (PEDECIBA), and Universidad de la República, Uruguay for funding.

502 Specific grants that funded this research: ANII\_FCE\_6180, ANII\_FCE\_136381, FCE\_4272.

503

#### 504 **References**

- 505 1. Oliveira RF. Social behavior in context: Hormonal modulation of behavioral plasticity and  
506 social competence. *Integr Comp Biol*. 2009 Jul 21;49(4):423–40.
- 507 2. Smith JM, Parker GA. The logic of asymmetric contests. *Anim Behav*. 1976 Feb 1;24(1):159–  
508 75.
- 509 3. Hurd PL. Resource holding potential, subjective resource value, and game theoretical models  
510 of aggressiveness signalling. *J Theor Biol*. 2006 Aug 7;241(3):639–48.
- 511 4. Piper WH, Mager JN, Walcott C, Furey L, Banfield N, Reinke A, et al. Territory settlement in  
512 common loons: no footholds but age and assessment are important. *Anim Behav*. 2015 Jun  
513 1;104:155–63.
- 514 5. Metcalfe NB, Van Leeuwen TE, Killen SS. Does individual variation in metabolic phenotype  
515 predict fish behaviour and performance? *J Fish Biol*. 2016 Jan;88(1):298–321.
- 516 6. Nolen ZJ, Allen PE, Miller CW. Seasonal resource value and male size influence male  
517 aggressive interactions in the leaf footed cactus bug, *Narnia femorata*. *Behav Processes*.  
518 2017 May 1;138:1–6.
- 519 7. Elliott JM. Mechanisms Responsible for Population Regulation in Young Migratory Trout,  
520 *Salmo trutta*. III. The Role of Territorial Behaviour. *J Anim Ecol*. 1990;59(3):803–18.

- 521 8. Butchart SHM, Seddon N, Ekstrom JMM. Polyandry and competition for territories in bronze-  
522 winged jacanas. *J Anim Ecol.* 1999;68(5):928–39.
- 523 9. Keeley ER. An experimental analysis of territory size in juvenile steelhead trout. *Anim Behav.*  
524 2000 Mar 1;59(3):477–90.
- 525 10. Adams ES. Approaches to the Study of Territory Size and Shape. *Annu Rev Ecol Syst.* 2001  
526 Nov 1;32(1):277–303.
- 527 11. Wauters L, Dhondt AA. Spacing behaviour of red squirrels, *Sciurus vulgaris*: variation  
528 between habitats and the sexes. *Anim Behav.* 1992 Feb 1;43(2):297–311.
- 529 12. Smith DC. Home range and territory in the striped plateau lizard (*Sceloporus virgatus*). *Anim*  
530 *Behav.* 1985 May 1;33(2):417–27.
- 531 13. Adkins-Regan E. *Hormones and Animal Social Behavior*. Princeton University Press; 2005. 431  
532 p.
- 533 14. Logan CA, Wingfield JC. Autumnal territorial aggression is independent of plasma  
534 testosterone in mockingbirds. *Horm Behav.* 1990 Dec 1;24(4):568–81.
- 535 15. Gwinner E, Rödl T, Schwabl H. Pair Territoriality of Wintering Stonechats: Behaviour,  
536 Function and Hormones. *Behav Ecol Sociobiol.* 1994;34(5):321–7.
- 537 16. Wingfield JC, Monk D. Behavioral and Hormonal Responses of Male Song Sparrows to  
538 Estradiol-Treated Females during the Non-breeding Season. *Horm Behav.* 1994 Jun  
539 1;28(2):146–54.
- 540 17. Soma KK, Sullivan K, Wingfield J. Combined Aromatase Inhibitor and Antiandrogen  
541 Treatment Decreases Territorial Aggression in a Wild Songbird during the Nonbreeding  
542 Season. *Gen Comp Endocrinol.* 1999 Sep 1;115(3):442–53.
- 543 18. Caldwell G, Glickman S, Smith E. Seasonal aggression independent of seasonal testosterone  
544 in wood rats. *Proc Natl Acad Sci U S A.* 1984 Aug;81(16):5255–7.
- 545 19. Jasnow AM, Huhman KL, Bartness TJ, Demas GE. Short-Day Increases in Aggression Are  
546 Inversely Related to Circulating Testosterone Concentrations in Male Siberian Hamsters  
547 (*Phodopus sungorus*). *Horm Behav.* 2000 Sep 1;38(2):102–10.
- 548 20. Demas GE, Cooper MA, Albers HE, Soma KK. Novel Mechanisms Underlying Neuroendocrine  
549 Regulation of Aggression: A Synthesis of Rodent, Avian, and Primate Studies. In: Lajtha A,  
550 Blaustein JD, editors. *Handbook of Neurochemistry and Molecular Neurobiology* [Internet].  
551 Boston, MA: Springer US; 2007 [cited 2019 Nov 15]. p. 337–72. Available from:  
552 [http://link.springer.com/10.1007/978-0-387-30405-2\\_8](http://link.springer.com/10.1007/978-0-387-30405-2_8)
- 553 21. Moore MC, Marler CA. Effects of testosterone manipulations on nonbreeding season  
554 territorial aggression in free-living male lizards, *Sceloporus jarrovi*. *Gen Comp Endocrinol.*  
555 1987 Feb 1;65(2):225–32.

- 556 22. Batista G, Zubizarreta L, Perrone R, Silva A. Non-sex-biased dominance in a sexually  
557 monomorphic electric fish: fight structure and submissive electric signalling. *Ethology*. 2012  
558 Apr 1;118(4):398–410.
- 559 23. Vulliou P, Bshary R, Ros AFH. Intra- and interspecific aggression do not modulate androgen  
560 levels in dusky gregories, yet male aggression is reduced by an androgen blocker. *Horm*  
561 *Behav*. 2013 Aug 1;64(3):430–8.
- 562 24. Monaghan EP, Glickman SE. Hormones and aggressive behavior. *Behav Endocrinol*.  
563 1992;134:692–694.
- 564 25. Nelson RJ. An introduction to behavioral endocrinology, 3rd ed. Sunderland, MA, US:  
565 Sinauer Associates; 2005. xvii, 822. (An introduction to behavioral endocrinology, 3rd ed.).
- 566 26. Simon NG, Lu S-F. Androgens and aggression. In: *Biology of aggression*. Oxford University  
567 Press, USA; 2006. p. 211–30.
- 568 27. Watson A, Parr R. Hormone Implants Affecting Territory Size and Aggressive and Sexual  
569 Behaviour in Red Grouse. *Ornis Scand Scand J Ornithol*. 1981;12(1):55–61.
- 570 28. Cardwell JR, Liley NR. Androgen control of social status in males of a wild population of  
571 stoplight parrotfish, *Sparisoma viride* (Scaridae). *Horm Behav*. 1991 Mar 1;25(1):1–18.
- 572 29. Sinervo B, Miles DB, Frankino WA, Klukowski M, DeNardo DF. Testosterone, Endurance, and  
573 Darwinian Fitness: Natural and Sexual Selection on the Physiological Bases of Alternative  
574 Male Behaviors in Side-Blotched Lizards. *Horm Behav*. 2000 Dec 1;38(4):222–33.
- 575 30. Mougeot F, Redpath SM, Moss R, Matthiopoulos J, Hudson PJ. Territorial behaviour and  
576 population dynamics in red grouse *Lagopus lagopus scoticus*. I. Population experiments. *J*  
577 *Anim Ecol*. 2003 Nov 1;72(6):1073–82.
- 578 31. Woodley SK, Moore MC. Ovarian Hormones Influence Territorial Aggression in Free-Living  
579 Female Mountain Spiny Lizards. *Horm Behav*. 1999 Jun 1;35(3):205–14.
- 580 32. Rubenstein DR, Wikelski M. Steroid hormones and aggression in female Galápagos marine  
581 iguanas. *Horm Behav*. 2005 Sep;48(3):329–41.
- 582 33. Pärn H, Lindström KM, Sandell M, Amundsen T. Female Aggressive Response and Hormonal  
583 Correlates—An Intrusion Experiment in a Free-Living Passerine. *Behav Ecol Sociobiol*.  
584 2008;62(10):1665–77.
- 585 34. Richer-de-Forges MM, Crampton WGR, Albert JS. A New Species of *Gymnotus*  
586 (*Gymnotiformes*, *Gymnotidae*) from Uruguay: Description of a Model Species in  
587 Neurophysiological Research. *Copeia*. 2009;2009(3):538–44.
- 588 35. Silva AC, Perrone R, Zubizarreta L, Batista G, Stoddard PK. Neuromodulation of the agonistic  
589 behavior in two species of weakly electric fish that display different types of aggression. *J Exp*  
590 *Biol*. 2013 Jul 1;216(13):2412.



- 591 36. Zubizarreta L, Stoddard PK, Silva A. Aggression Levels Affect Social Interaction in the Non-  
592 Breeding Territorial Aggression of the Weakly Electric Fish, *Gymnotus omarorum*. *Ethology*.  
593 2015 Jan 1;121(1):8–16.
- 594 37. Perrone R, Silva AC. Status-Dependent Vasotocin Modulation of Dominance and  
595 Subordination in the Weakly Electric Fish *Gymnotus omarorum*. *Front Behav Neurosci*.  
596 2018;12:1.
- 597 38. Perrone R, Pedraja F, Valiño G, Tassinio B, Silva A. Non-breeding territoriality and the effect of  
598 territory size on aggression in the weakly electric fish, *Gymnotus omarorum*. *Acta Ethologica*.  
599 2019 Jun 1;22(2):79–89.
- 600 39. Quintana L, Zubizarreta L, Jalabert C, Batista G, Perrone R, Silva A. Building the case for a  
601 novel teleost model of non-breeding aggression and its neuroendocrine control. *Journal of*  
602 *Physiology-Paris*. 2016 Oct 1;110(3, Part B):224–32.
- 603 40. Jalabert C, Quintana L, Pessina P, Silva A. Extra-gonadal steroids modulate non-breeding  
604 territorial aggression in weakly electric fish. *Horm Behav*. 2015 Jun 1;72:60–7.
- 605 41. Marroni S, Iglesias C, Mazzeo N, Clemente J, Teixeira de Mello F, Pacheco JP. Alternative food  
606 sources of native and non-native bivalves in a subtropical eutrophic lake. *Hydrobiologia*.  
607 2014 Sep 1;735(1):263–76.
- 608 42. Quintana L, Silva A, Berois N, Macadar O. Temperature induces gonadal maturation and  
609 affects electrophysiological sexual maturity indicators in *Brachyhypopomus*  
610 *pinnicaudatus* from a temperate climate. *J Exp Biol*. 2004 May 1;207(11):1843.
- 611 43. Migliaro A, Moreno V, Marchal P, Silva A. Daily changes in the electric behavior of weakly  
612 electric fish naturally persist in constant darkness and are socially synchronized. *Biol Open*.  
613 2018 Dec 15;7(12):bio036319.
- 614 44. Silva A, Quintana L, Galeano M, Errandonea P. Biogeography and Breeding in Gymnotiformes  
615 from Uruguay. *Environ Biol Fishes*. 2003 Apr 1;66(4):329–38.
- 616 45. Moller P. *Electric fishes: history and behavior*. Vol. 17. Springer; 1995.
- 617 46. Caputi AA, Aguilera PA, Castelló ME. Probability and amplitude of novelty responses as a  
618 function of the change in contrast of the reafferent image in *G. carapo*. *J Exp Biol*. 2003 Mar  
619 15;206(6):999.
- 620 47. Dunlap KD, Smith GT, Yekta A. Temperature Dependence of Electrocommunication Signals  
621 and Their Underlying Neural Rhythms in the Weakly Electric Fish, *Apteronotus*  
622 *leptorhynchus*. *Brain Behav Evol*. 2000;55(3):152–62.
- 623 48. Silva A, Perrone R, Macadar O. Environmental, seasonal, and social modulations of basal  
624 activity in a weakly electric fish. *Incl Spec Sect Chronobiol Asp Sleep--Wake Cycle*  
625 *Thermoregulation*. 2007 Feb 28;90(2):525–36.

- 626 49. Fox HE, White SA, Kao MHF, Fernald RD. Stress and Dominance in a Social Fish. *J Neurosci*.  
627 1997 Aug 15;17(16):6463.
- 628 50. Dunlap KD, Smith GT, Yekta A. Temperature Dependence of Electrocommunication Signals  
629 and Their Underlying Neural Rhythms in the Weakly Electric Fish, *Apteronotus*  
630 *leptorhynchus*. *Brain Behav Evol*. 2000;55(3):152–62.
- 631 51. Salazar VL, Stoddard PK. Sex differences in energetic costs explain sexual dimorphism in the  
632 circadian rhythm modulation of the electrocommunication signal of the gymnotiform fish  
633 *Brachyhyppopomus pinnicaudatus*. *J Exp Biol*. 2008 Mar 15;211(6):1012.
- 634 52. Anderson RO, Gutreuter SJ, Nielsen L, Johnson D. Fisheries techniques. In: Fish Farmin,  
635 Handbook. American Fisheries Society, Bethesda Maryland. Brown; 1983. p. 237–337.
- 636 53. Sink TD, Lochmann RT, Fecteau KA. Validation, use, and disadvantages of enzyme-linked  
637 immunosorbent assay kits for detection of cortisol in channel catfish, largemouth bass, red  
638 pacu, and golden shiners. *Fish Physiol Biochem*. 2008 Mar;34(1):95–101.
- 639 54. Zuur A, Ieno EN, Smith GM. *Analyzing Ecological Data*. Springer; 2007. 686 p.
- 640 55. McLeod A, Xu C. *bestglm: Best Subset GLM*. 2011.
- 641 56. McCullagh P, Nelder JA. *Generalized linear models*. 2nd ed. London New York: Chapman  
642 and Hall; 1989.
- 643 57. Conover WJ. *Practical Nonparametric Statistics*. USA: John Wiley & Sons, Inc; 1971.
- 644 58. Hammer Ø, Harper DA, Ryan PD. PAST: Paleontological statistics software package for  
645 education and data analysis. *Palaeontol Electron*. 2001;4(1):art 4.
- 646 59. R Core Team. *R: A language and environment for statistical computing*. Vienna, Austria: R  
647 Foundation for Statistical Computing; 2012.
- 648 60. Peters R. The ecological implications of body size [Internet]. Cambridge University Press;  
649 1983 [cited 2019 Nov 12]. Available from:  
650 [https://scholar.google.com/scholar?hl=en&as\\_sdt=0%2C5&q=Peters+RH.+1983.+The+ecolog](https://scholar.google.com/scholar?hl=en&as_sdt=0%2C5&q=Peters+RH.+1983.+The+ecolog)  
651 [ical+implications+of+body+size.+Cambridge+University+Press%2C+USA&btnG=](https://scholar.google.com/scholar?hl=en&as_sdt=0%2C5&q=Peters+RH.+1983.+The+ecolog)
- 652 61. Brown JH, Gillooly JF, Allen AP, Savage VM, West GB. Toward a metabolic theory of ecology.  
653 *Ecology*. 2004 Jul 1;85(7):1771–89.
- 654 62. Woodward G, Ebenman B, Emmerson M, Montoya JM, Olesen JM, Valido A, et al. Body size  
655 in ecological networks. *Trends Ecol Evol*. 2005 Jul 1;20(7):402–9.
- 656 63. White EP, Ernest SKM, Kerkhoff AJ, Enquist BJ. Relationships between body size and  
657 abundance in ecology. *Trends Ecol Evol*. 2007 Jun 1;22(6):323–30.

- 658 64. Allen CR, Garmestani AS, Havlicek TD, Marquet PA, Peterson GD, Restrepo C, et al. Patterns  
659 in body mass distributions: sifting among alternative hypotheses. *Ecol Lett*. 2006 May  
660 1;9(5):630–43.
- 661 65. Violle C, Enquist BJ, McGill BJ, Jiang L, Albert CH, Hulshof C, et al. The return of the variance:  
662 intraspecific variability in community ecology. *Trends Ecol Evol*. 2012 Apr 1;27(4):244–52.
- 663 66. La VT, Cooke SJ. Advancing the Science and Practice of Fish Kill Investigations. *Rev Fish Sci*.  
664 2011 Jan 3;19(1):21–33.
- 665 67. Crampton WGR. Effects of anoxia on the distribution, respiratory strategies and electric  
666 signal diversity of gymnotiform fishes. *J Fish Biol*. 1998;53(sA):307–30.
- 667 68. Moraes G, Avilez IM, Altran AE, Barbosa CC. Biochemical and hematological responses of the  
668 banded knife fish *Gymnotus carapo* (Linnaeus, 1758) exposed to environmental hypoxia.  
669 *Braz J Biol*. 2002;62:633–40.
- 670 69. Osório R, Rosa IL, Cabral H. Territorial defence by the Brazilian damsel *Stegastes fuscus*  
671 (Teleostei: Pomacentridae). *J Fish Biol*. 2006 Jul 1;69(1):233–42.
- 672 70. Börger L, Dalziel BD, Fryxell JM. Are there general mechanisms of animal home range  
673 behaviour? A review and prospects for future research. *Ecol Lett*. 2008 Jun 1;11(6):637–50.
- 674 71. Markham MR, Ban Y, McCauley AG, Maltby R. Energetics of Sensing and Communication in  
675 Electric Fish: A Blessing and a Curse in the Anthropocene? *Integr Comp Biol*. 2016;56(5):889–  
676 900.
- 677 72. Gavassa S, Silva AC, Stoddard PK. Tight hormonal phenotypic integration ensures honesty of  
678 the electric signal of male and female *Brachyhypopomus gauderio*. *Horm Behav*. 2011 Sep  
679 1;60(4):420–6.
- 680 73. Gavassa S, Goldina A, Silva AC, Stoddard PK. Behavioral ecology, endocrinology and signal  
681 reliability of electric communication. *J Exp Biol*. 2013 Jul 1;216(13):2403.
- 682 74. Pedraja F, Perrone R, Silva A, Budelli R. Passive and active electroreception during agonistic  
683 encounters in the weakly electric fish *Gymnotus omarorum*. *Bioinspir Biomim*. 2016 Oct  
684 21;11(6):065002.
- 685 75. West-Eberhard MJ. Sexual Selection, Social Competition, and Speciation. *Q Rev Biol*. 1983  
686 Jun 1;58(2):155–83.
- 687 76. Tobias JA, Montgomerie R, Lyon BE. The evolution of female ornaments and weaponry:  
688 social selection, sexual selection and ecological competition. *Philos Trans R Soc B Biol Sci*.  
689 2012 Aug 19;367(1600):2274–93.
- 690 77. Whittingham LA, Kirkconnell A, Ratcliffe LM. Differences in Song and Sexual Dimorphism  
691 between Cuban and North American Red-Winged Blackbirds (*Agelaius phoeniceus*). *The Auk*.  
692 1992;109(4):928–33.

- 693 78. Tobias JA, Gamarra-Toledo V, García-Olaechea D, Pulgarín PC, Seddon N. Year-round  
694 resource defence and the evolution of male and female song in suboscine birds: social  
695 armaments are mutual ornaments. *J Evol Biol.* 2011 Oct 1;24(10):2118–38.
- 696 79. Odreitz U, Sefc KM. Territorial competition and the evolutionary loss of sexual size  
697 dimorphism. *Behav Ecol Sociobiol.* 2015 Apr 1;69(4):593–601.
- 698 80. McEwen BS, Wingfield JC. The concept of allostasis in biology and biomedicine. *Horm Behav.*  
699 2003 Jan 1;43(1):2–15.
- 700 81. Hirschenhauser K, Oliveira RF. Social modulation of androgens in male vertebrates: meta-  
701 analyses of the challenge hypothesis. *Anim Behav.* 2006 Feb 1;71(2):265–77.
- 702 82. Albert DJ, Jonik RH, Walsh ML. Hormone-dependent aggression in female rats: Testosterone  
703 implants attenuate the decline in aggression following ovariectomy. *Physiol Behav.* 1990 Apr  
704 1;47(4):659–64.
- 705 83. Rendon NM, Amez AC, Proffitt MR, Bauserman ER, Demas GE. Aggressive behaviours track  
706 transitions in seasonal phenotypes of female Siberian hamsters. *Funct Ecol.* 2017 May  
707 1;31(5):1071–81.
- 708 84. Scaia MF, Morandini L, Noguera C, Trudeau VL, Somoza GM, Pandolfi M. Can estrogens be  
709 considered as key elements of the challenge hypothesis? The case of intrasexual aggression  
710 in a cichlid fish. *Physiol Behav.* 2018 Oct 1;194:481–90.
- 711

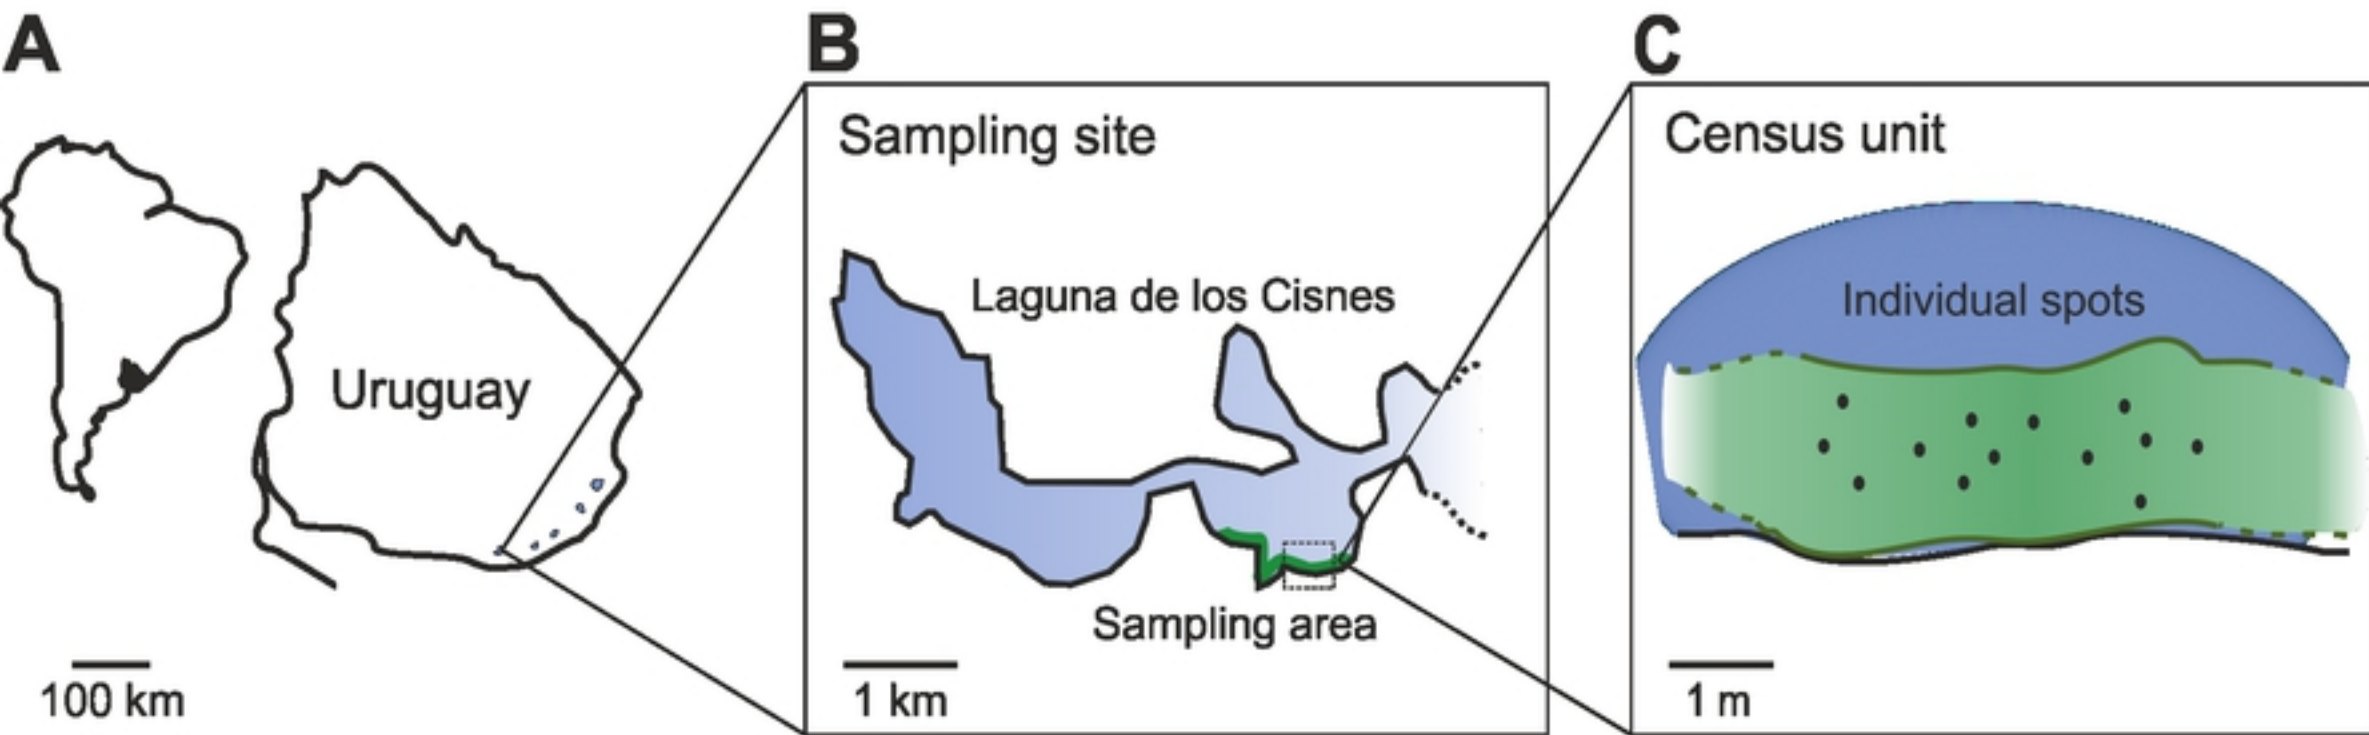

Figure 1

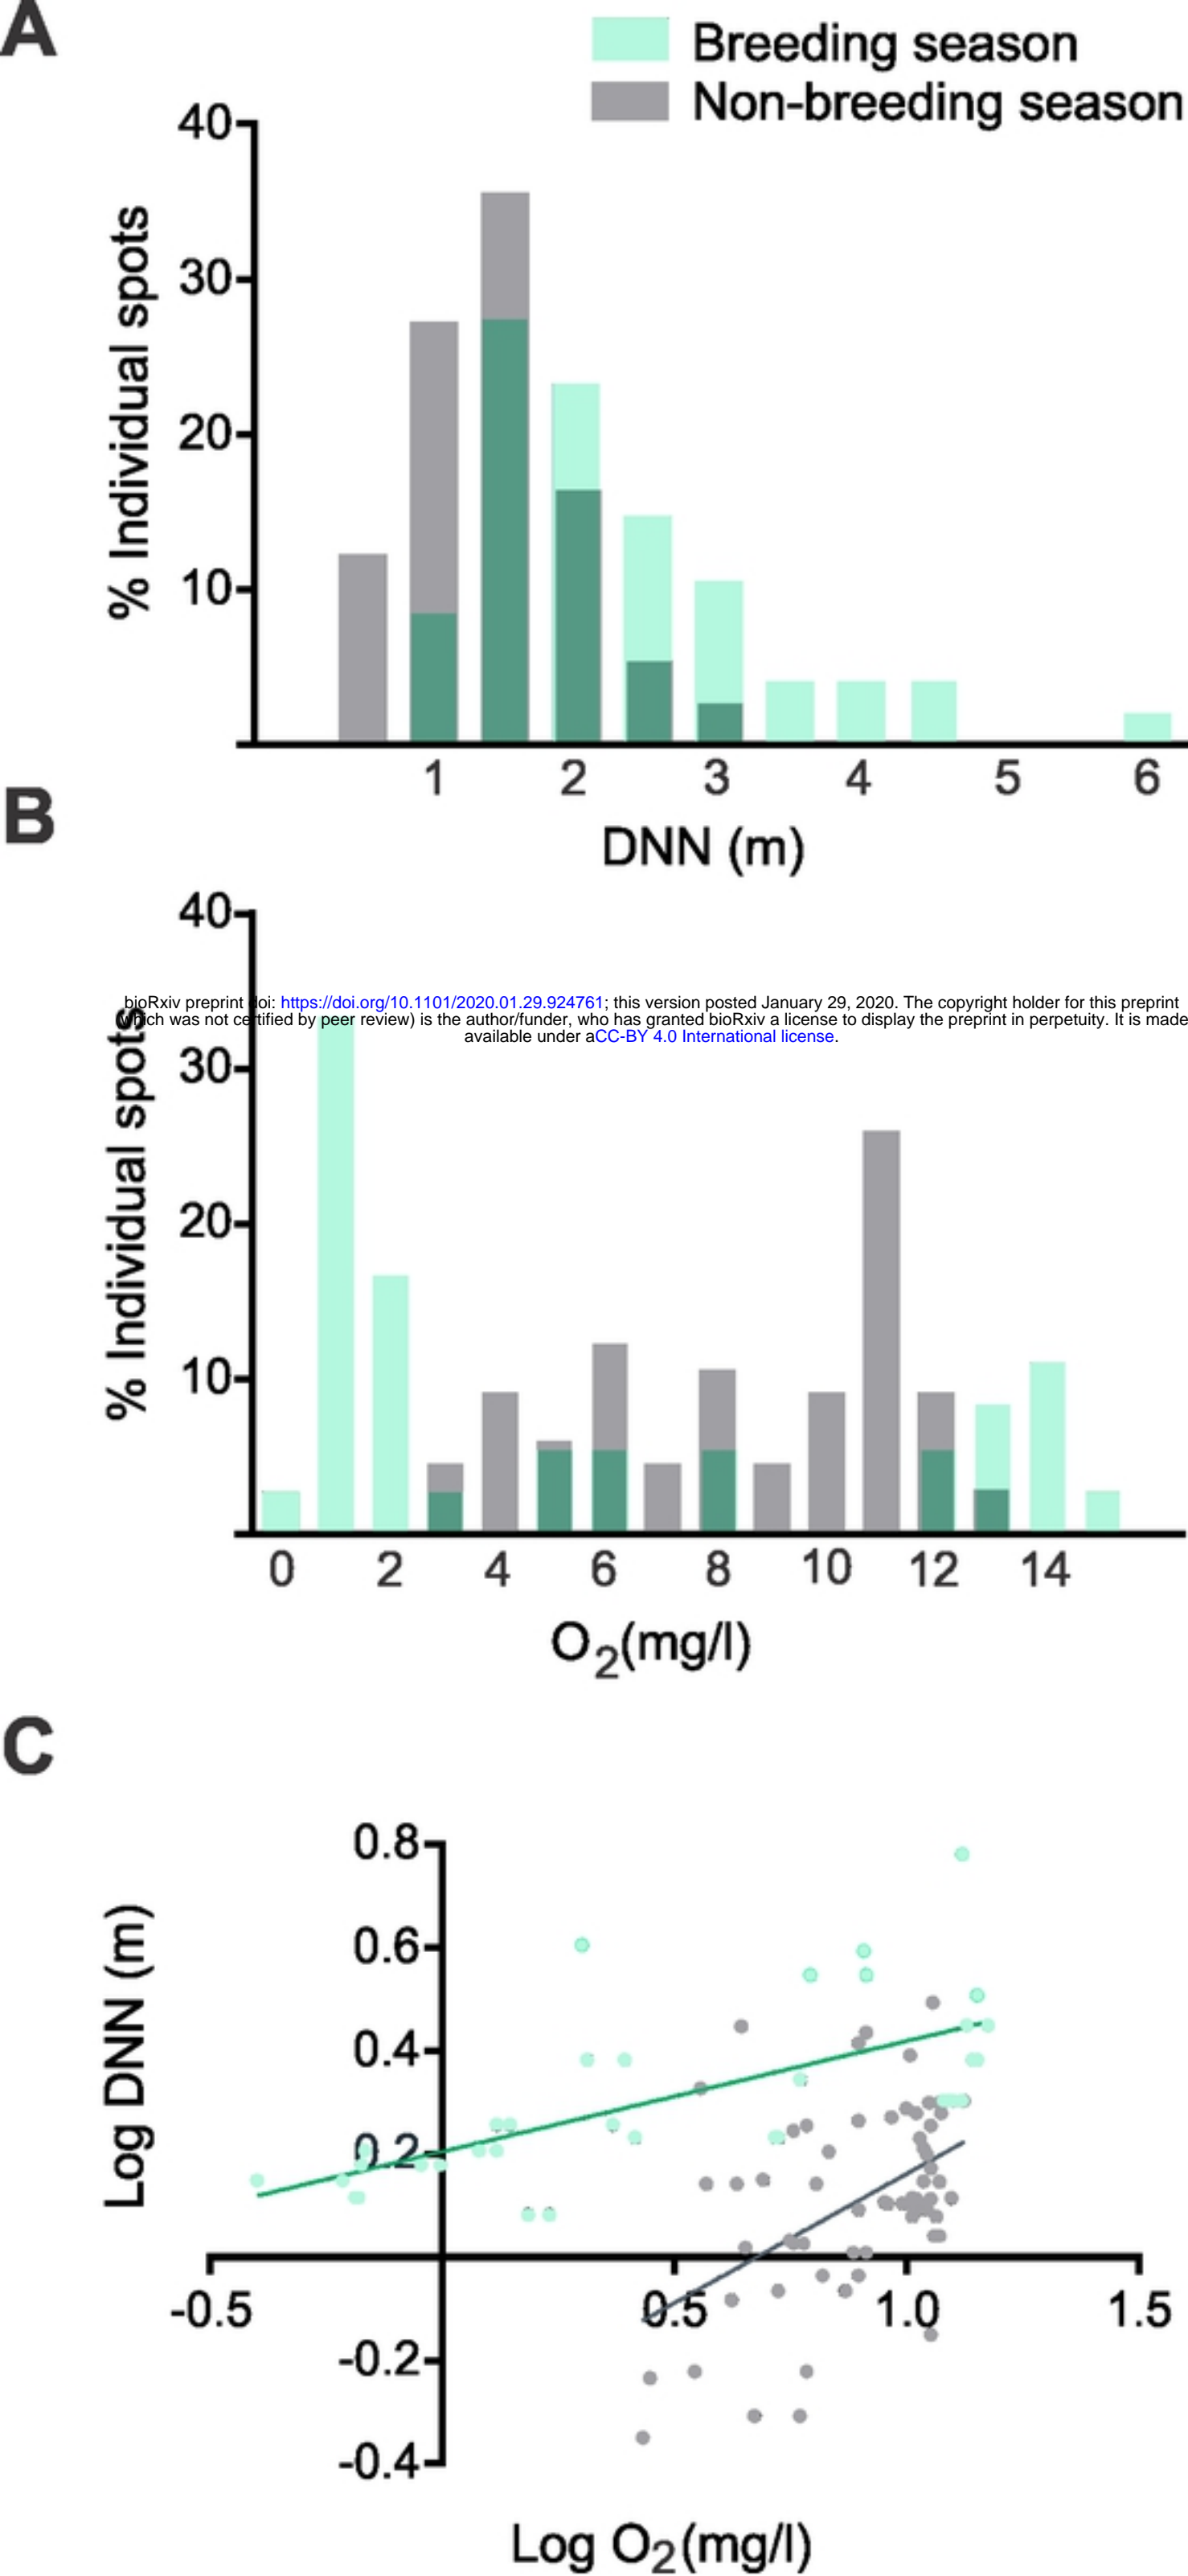

Figure 2

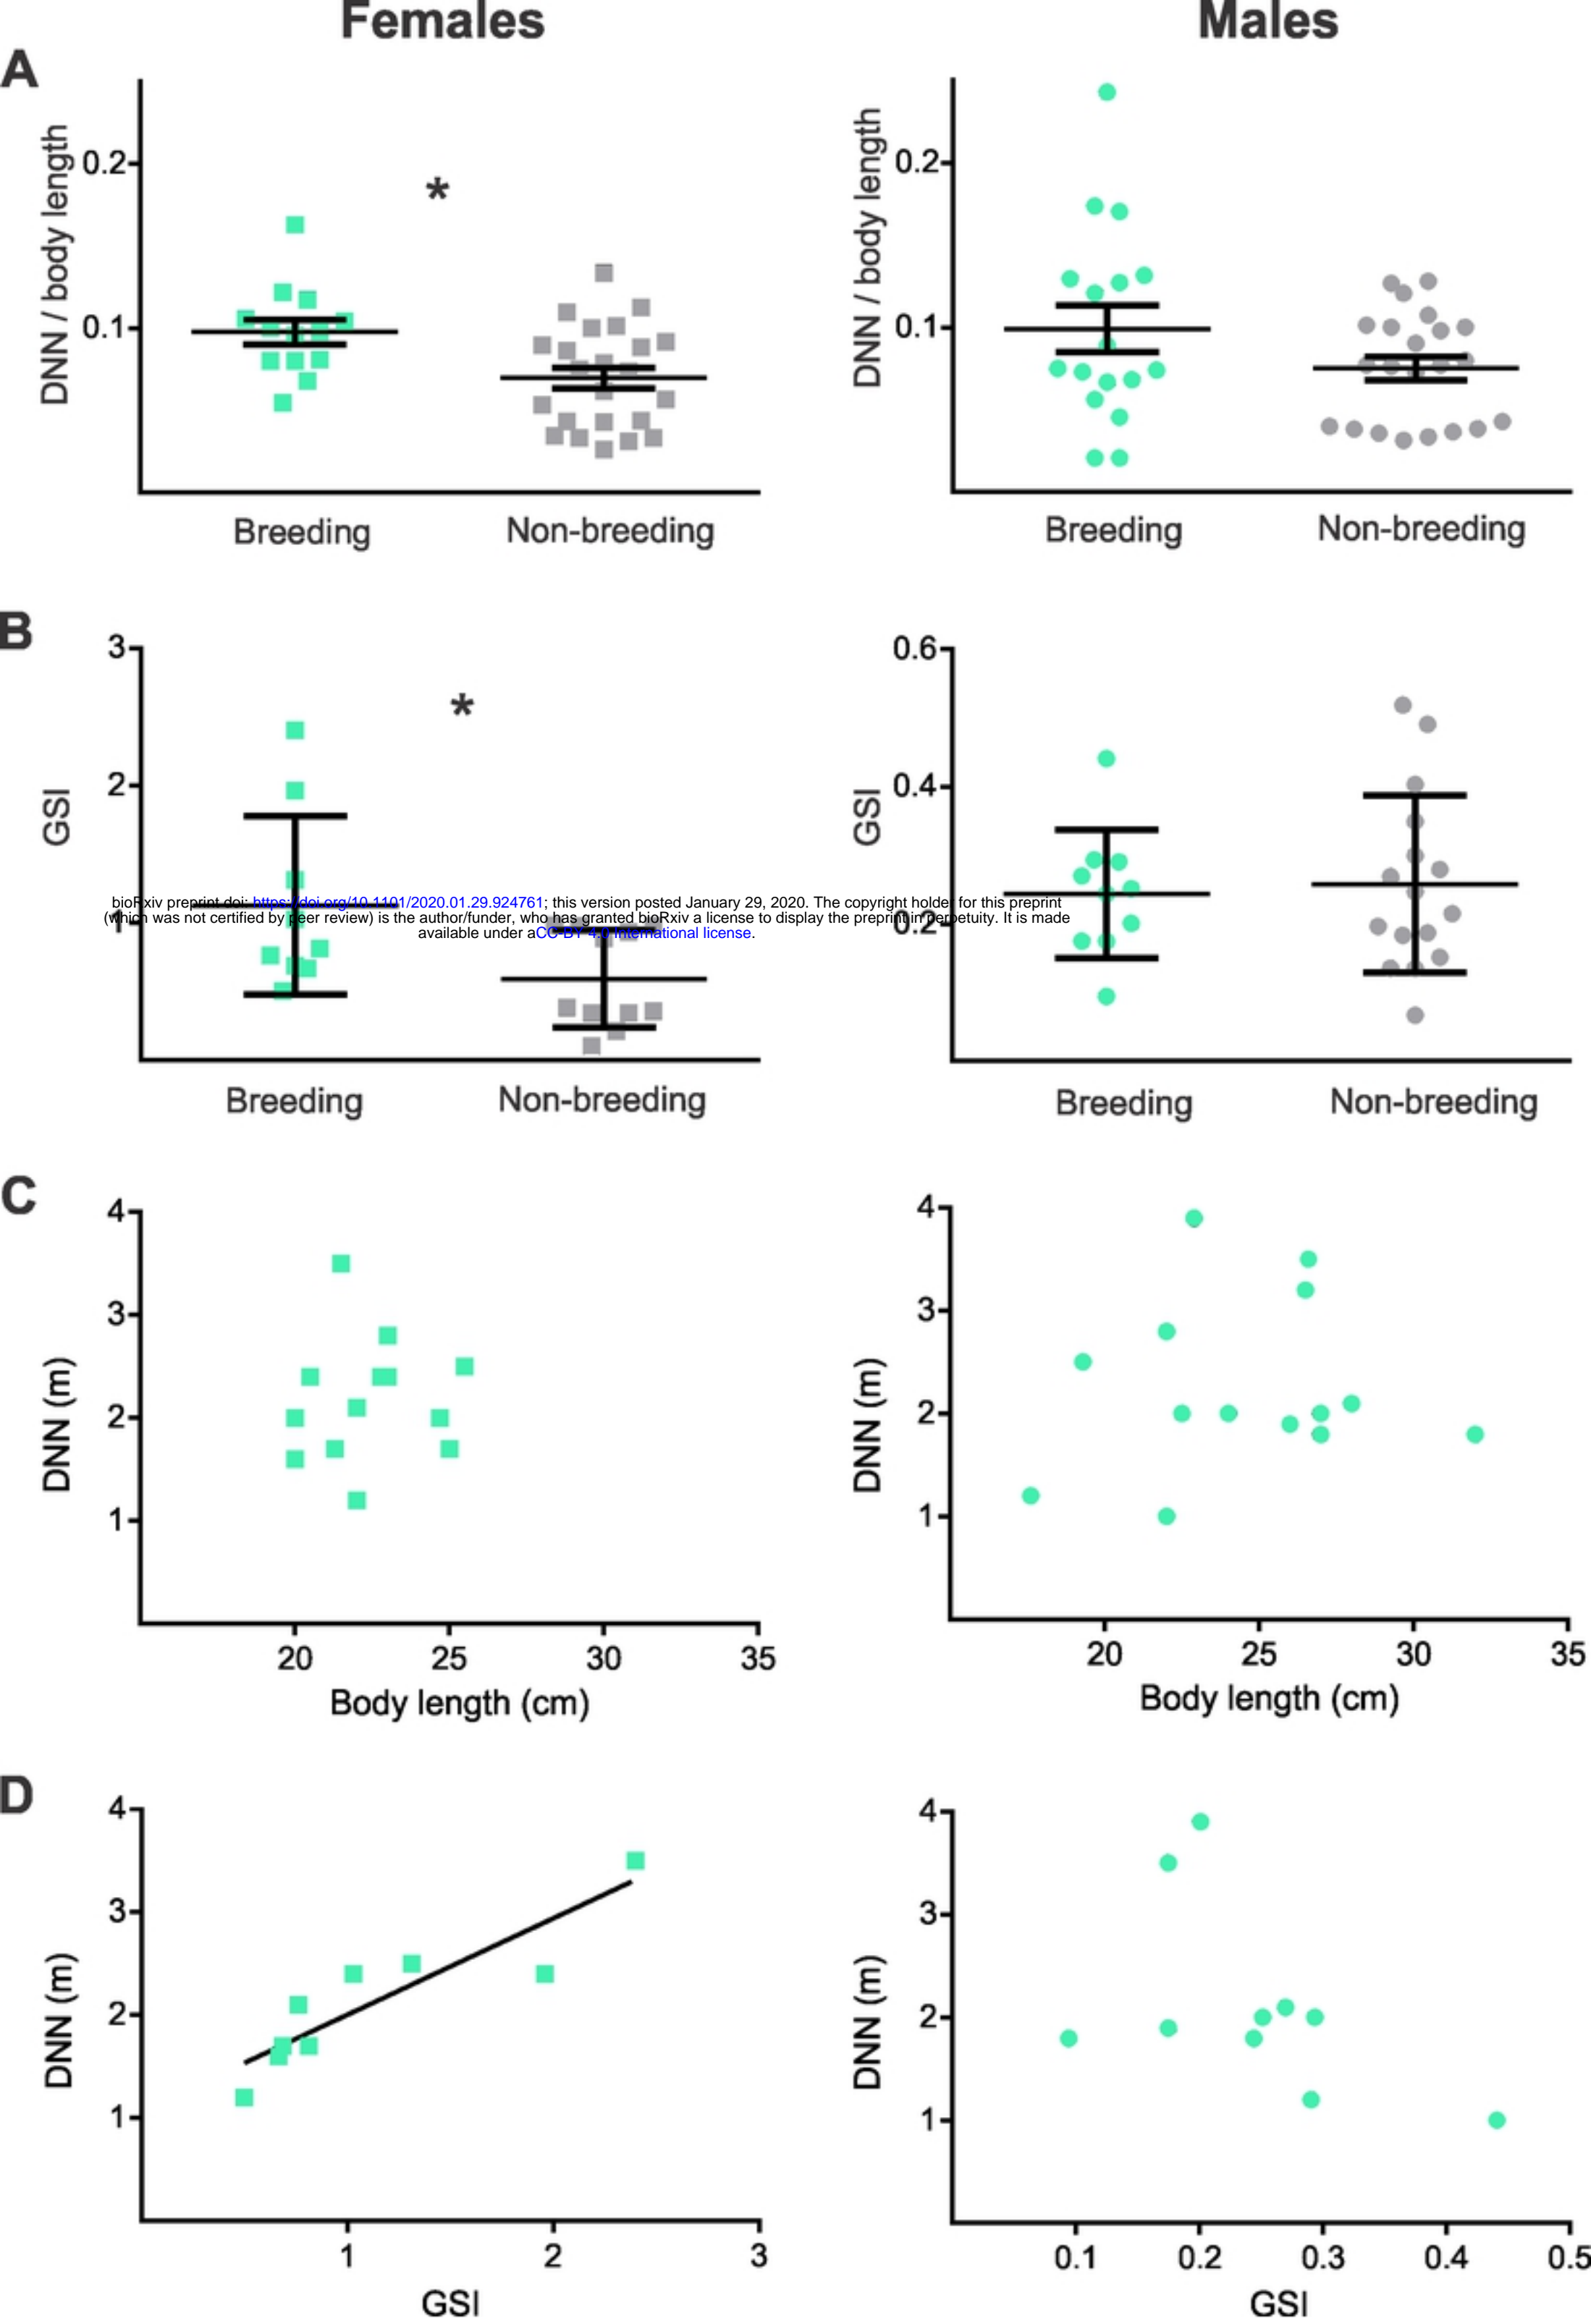

Figure 3

**A**

# Breeding season

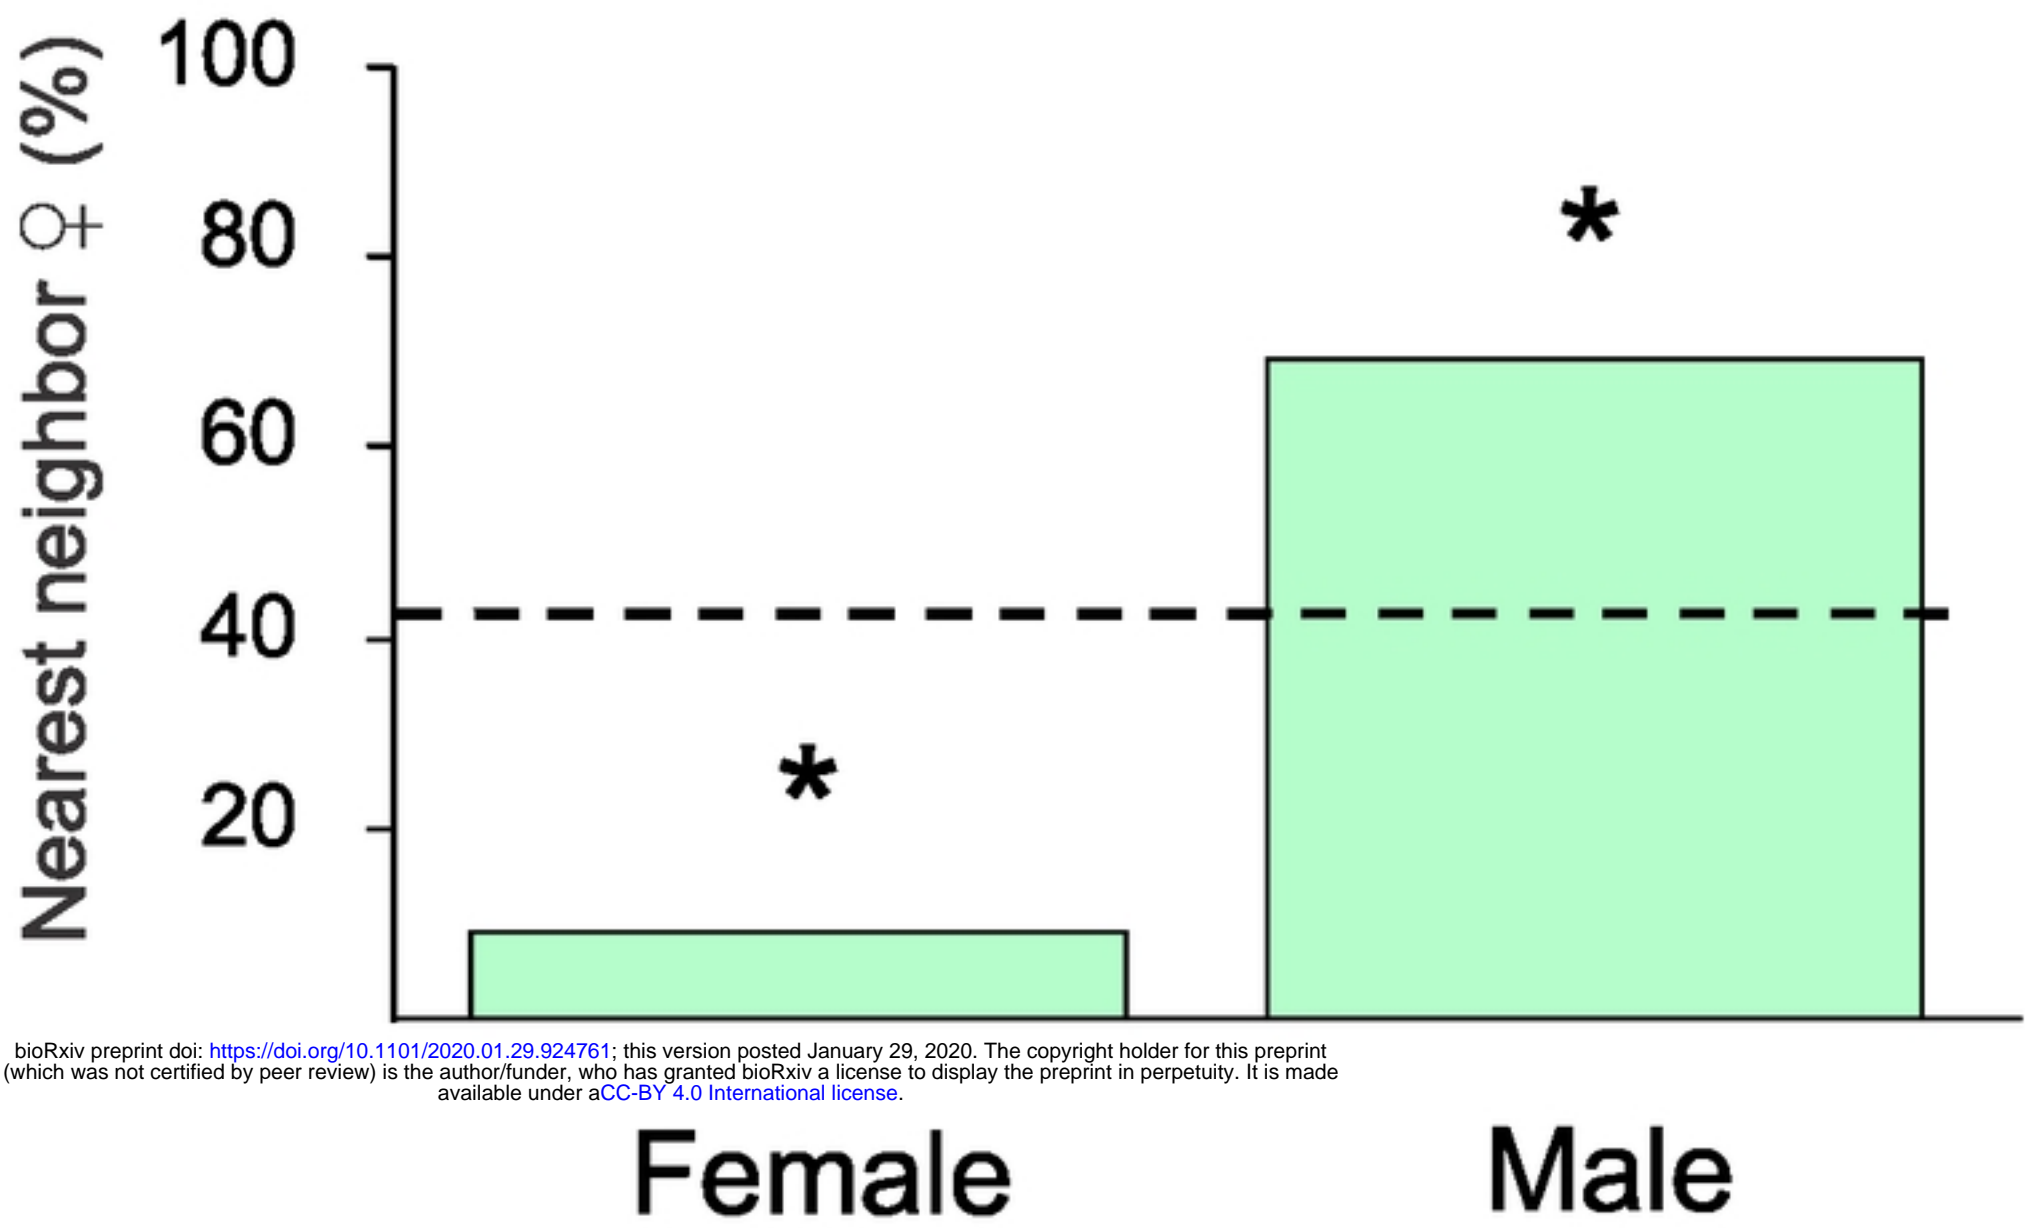**B**

# Non-breeding season

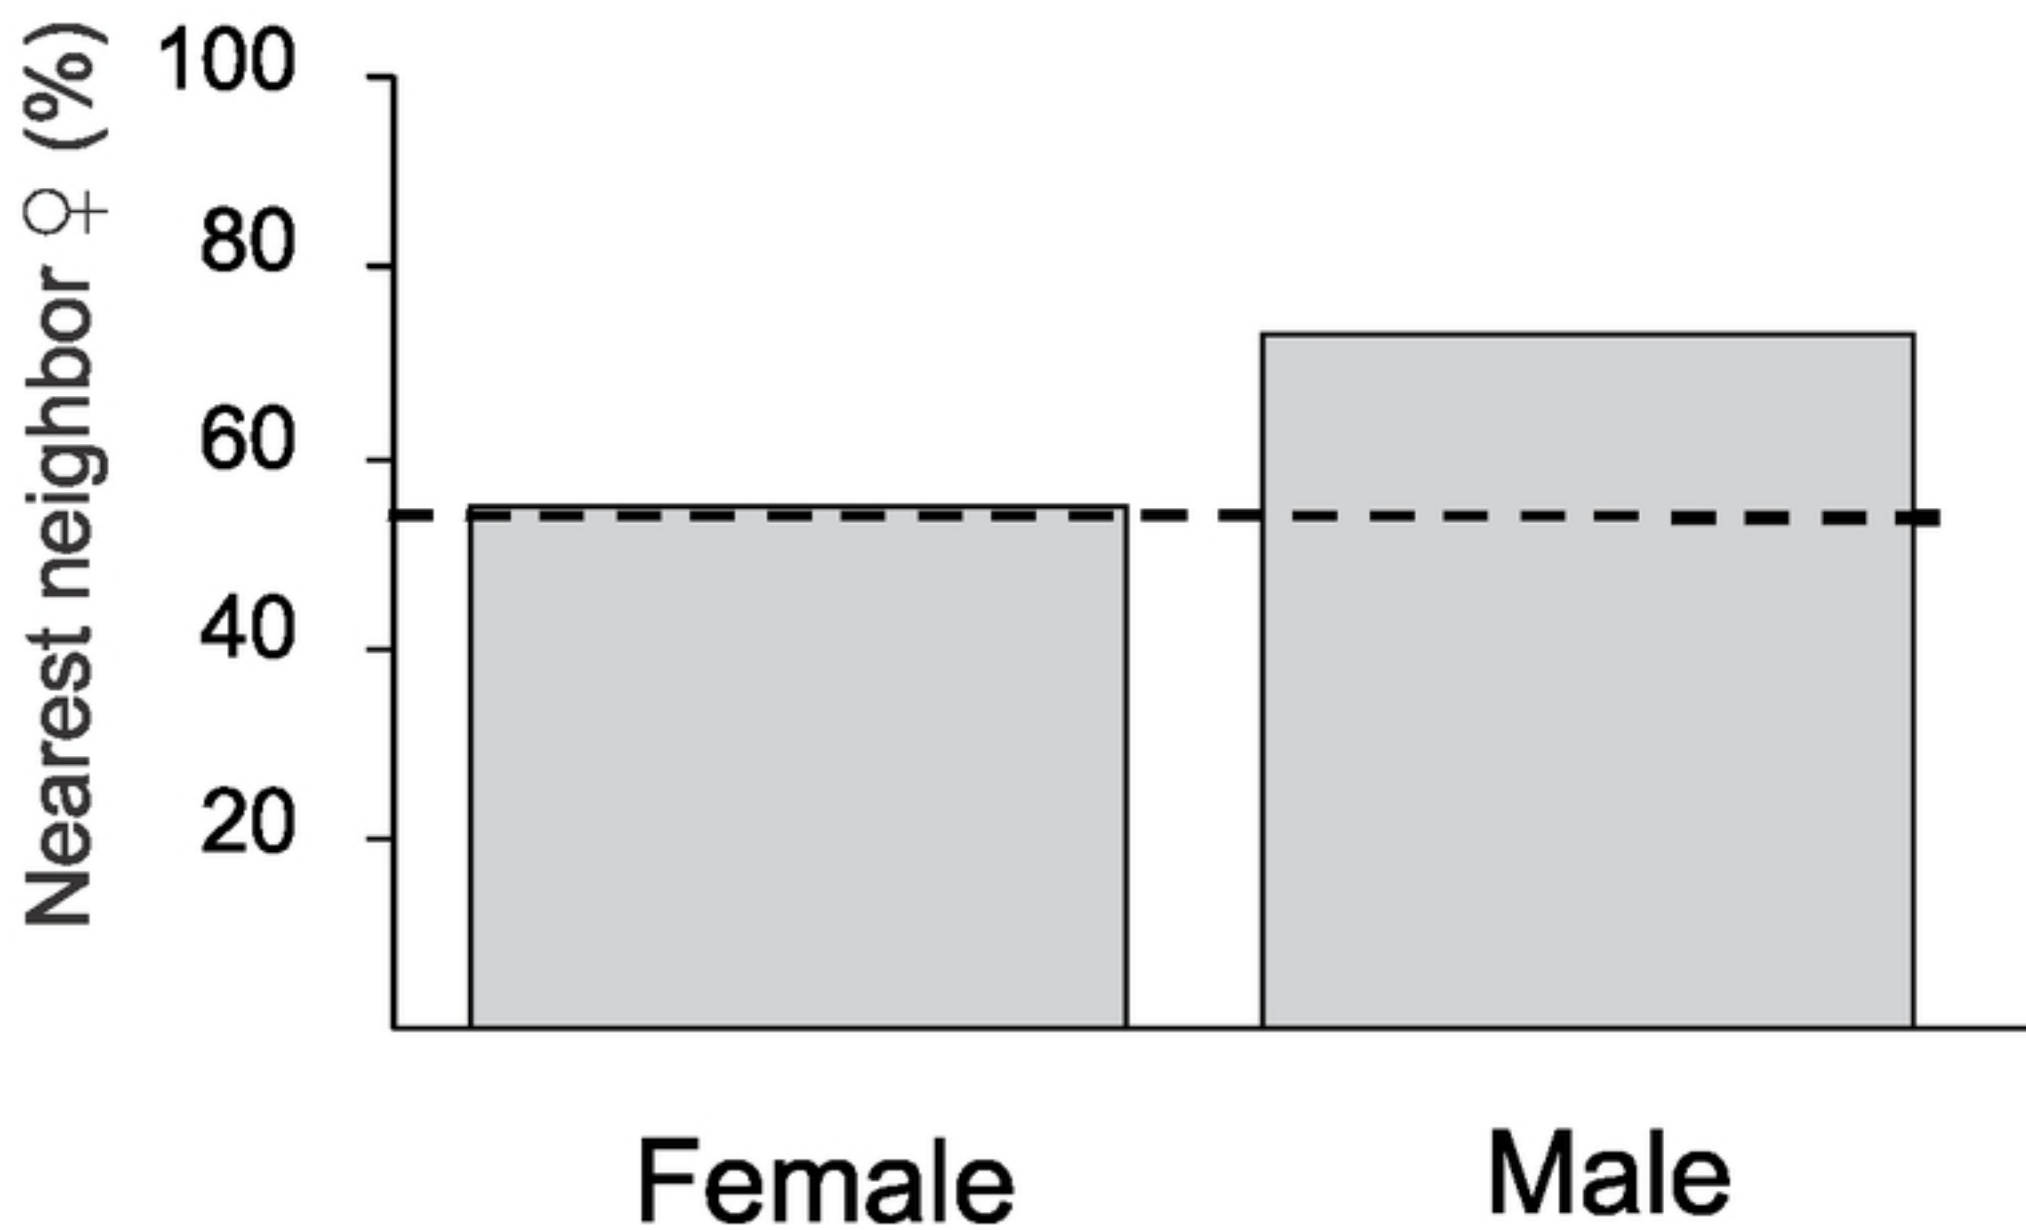

Figure 4
